# Supplementary material for: A Small-Sized Population of Human Umbilical Cord Blood-Derived Mesenchymal Stem Cells Shows High Stemness Properties and Therapeutic Benefit
Source: Hindawi journal article supplement (doi:10.1155/2020/5924983), 2020-04-28
Supplement: f1 [file 5924983.f1.pdf]

## **Supplementary Materials**

**A small-sized population of human umbilical cord blood-derived mesenchymal stem cells shows high stemness properties and therapeutic benefit**

**Miyeon Kim, Yun Kyung Bae, Soyoun Um, Ji Hye Kwon, Gee-Hye Kim, Soo Jin Choi, Wonil Oh, Hye Jin Jin \***

Biomedical Research Institute, MEDIPOST Co., Ltd., Seongnam 13494, Republic of Korea

**\*Corresponding authors:**

Hye Jin Jin, Ph.D.

Biomedical Research Institute, MEDIPOST Co., Ltd., Seongnam, 13494, Republic of Korea

Tel: 82-2-3465-6780; Fax: 82-2-3465-6754; E-mail: [genny77@medi-post.co.kr](mailto:genny77@medi-post.co.kr)

## Supplementary Methods

### *Human antibody array*

To obtain superannuants small or heterogenous, cells were serum starved for 24 h, washed, and then cultivated for a further 24 h with fresh serum-free medium. The conditioned media from each sample was tested to a glass chip containing 507 antibodies (Human Antibody Array L series, RayBiotech, Peachtree Corners, GA) according to the manufacturer's protocol. The detail information of antibody array can be accessed in the webpage of RayBiotech ([www.raybiotech.com/l-series-507-label-based-human-array-1-glass-slide-2](http://www.raybiotech.com/l-series-507-label-based-human-array-1-glass-slide-2)). Fluorescence detection were analyzed using a GenePix 4000B scanner (Molecular Devices, Sunnyvale, CA), which were performed by e-biogen (Seoul, Korea) using GenePix Pro 6.0 software (Axon Instruments). Quantified values were normalized to the positive control. We compared to demonstrate the relative change in expression levels of each protein between group. (Small cell vs. Heterogenous cell).

**Supplementary Figure 1.** Differently-sized populations of UCB-MSCs after sieving. (a) Isolation methods by cell size. In three populations (heterogeneous, large, small), cells showed different cell sizes under the microscope (scale bar = 10  $\mu\text{m}$ ). (b) Cell sizes were confirmed by FSC analysis.

**a**

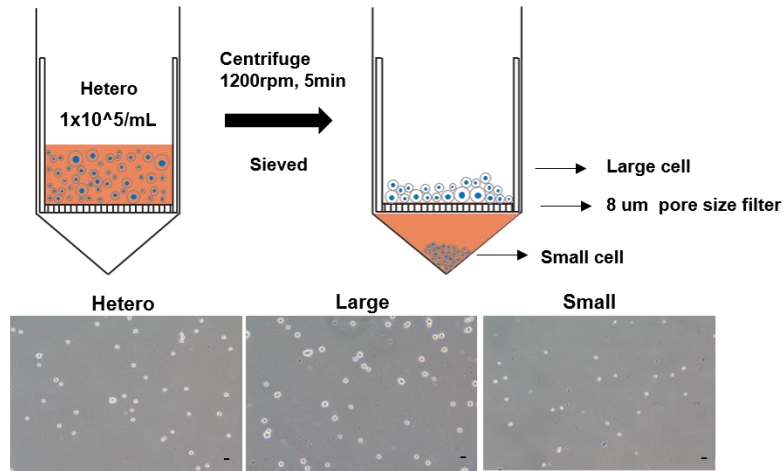

**b**

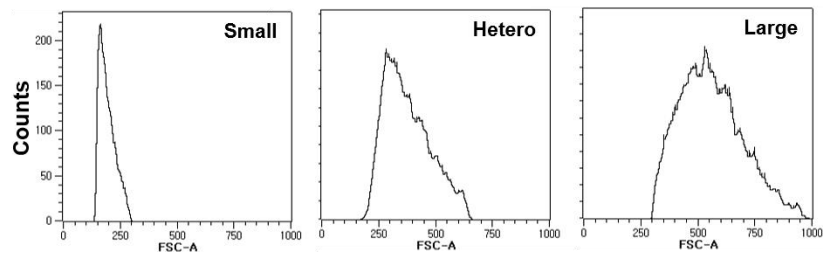

**Supplementary Figure 2.** Cumulative PD in group I (n = 4) and group II (n = 6) of 10 individual cases of UCB-MSCs (mean  $\pm$  SD; \*\* p < 0.01).; PD, population doubling.

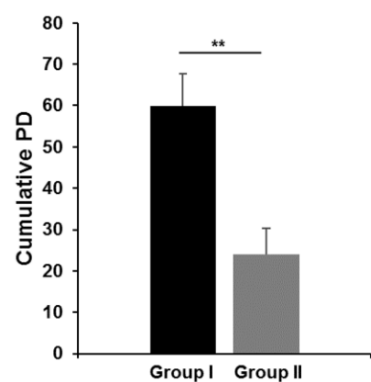

**Supplementary Figure 3.** Silencing of EGFR or CD49f gene expression in UCB-MSCs. Both *EGFR* and *CD49f* gene levels decreased in target siRNA-treated cells compared to those in naïve or siCon-treated cells. Downregulation of the two genes was confirmed by qPCR. The expression levels of all genes were normalized to those of  $\beta$ -actin in naïve cells, which was defined as 1-fold expression (mean  $\pm$  SD, n = 3; \*\* p < 0.01).

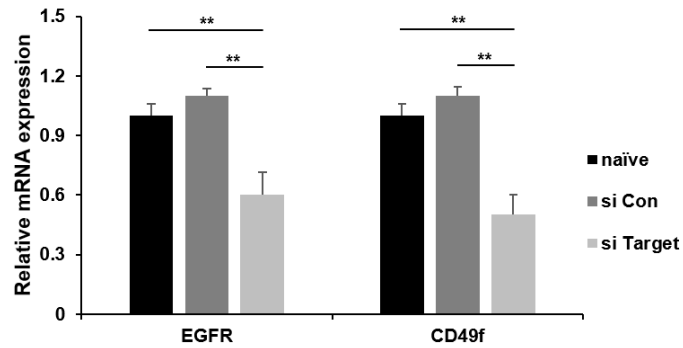

**Supplementary Figure 4.** EGFR and CD49f sorting by flow cytometry. The percentage of EGFR<sup>+</sup> (a) or CD49f<sup>+</sup> (b) cells was analyzed.

**a**

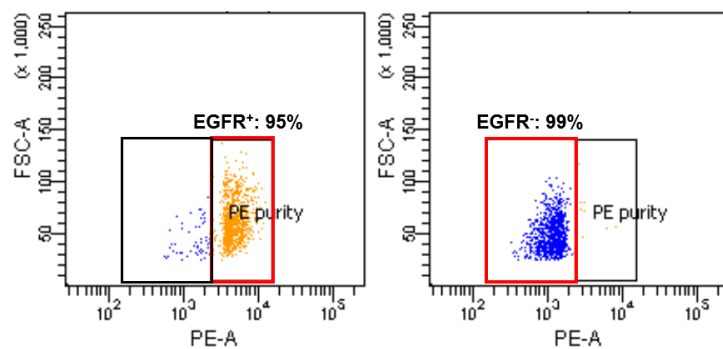

**b**

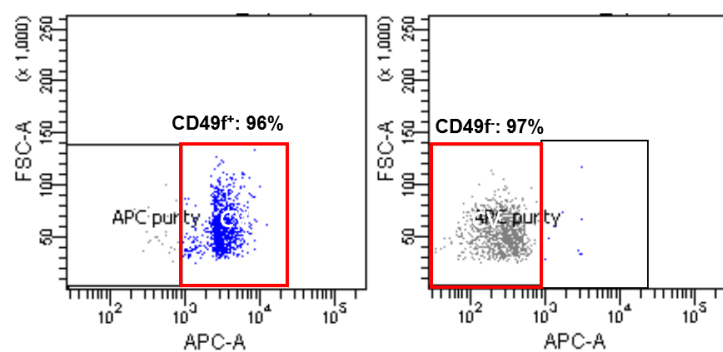

**Supplementary Figure 5.** Features of UCB-MSCs sorted based on EGFR or CD49f expression. (a) EGFR<sup>+</sup> and EGFR<sup>-</sup> cells were isolated using a FACS Vantage sorting system. In each population, cell size, osteogenic features, and senescence were examined by microscopy, ALP staining, and SA  $\beta$ -gal staining, as indicated. CD49f<sup>+</sup> and CD49f<sup>-</sup> cells were isolated using a FACS Vantage sorting system. In each population, cell size or osteogenic features were examined by microscopy and ALP staining. Scale bars = 50  $\mu$ m.

**a**

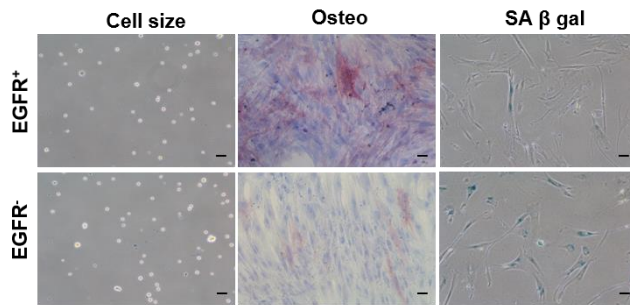

**b**

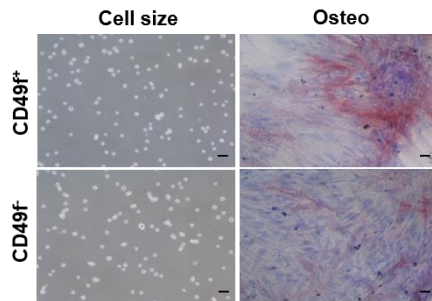

**Supplementary Figure 6.** Heterogeneous sizes of MSCs from different adult tissues. BM- and AT-MSCs were prepared. UCB-MSCs were used as a control. (a) MSCs from three sources were observed as spindle-like fibroblastoid cells with heterogeneous shapes and cell sizes (Scale bar = 10  $\mu$ m). (b) The distribution of cell size was analyzed. (c) Growth kinetics were measured based on population doubling (PD) until P6 (mean  $\pm$  SD, n = 6; \*\* p < 0.01). P: passage. (d) CD49b, CD49d, CD49f, CD340, and EGFR expression levels were checked by flow cytometry in MSCs from three sources (means  $\pm$  SD, n = 3; \*\* p < 0.01). Expression levels were defined as 1-fold in UCB-MSCs. Both CD49f and EGFR showed significant increases in small cells compared to levels in other groups (gray box).

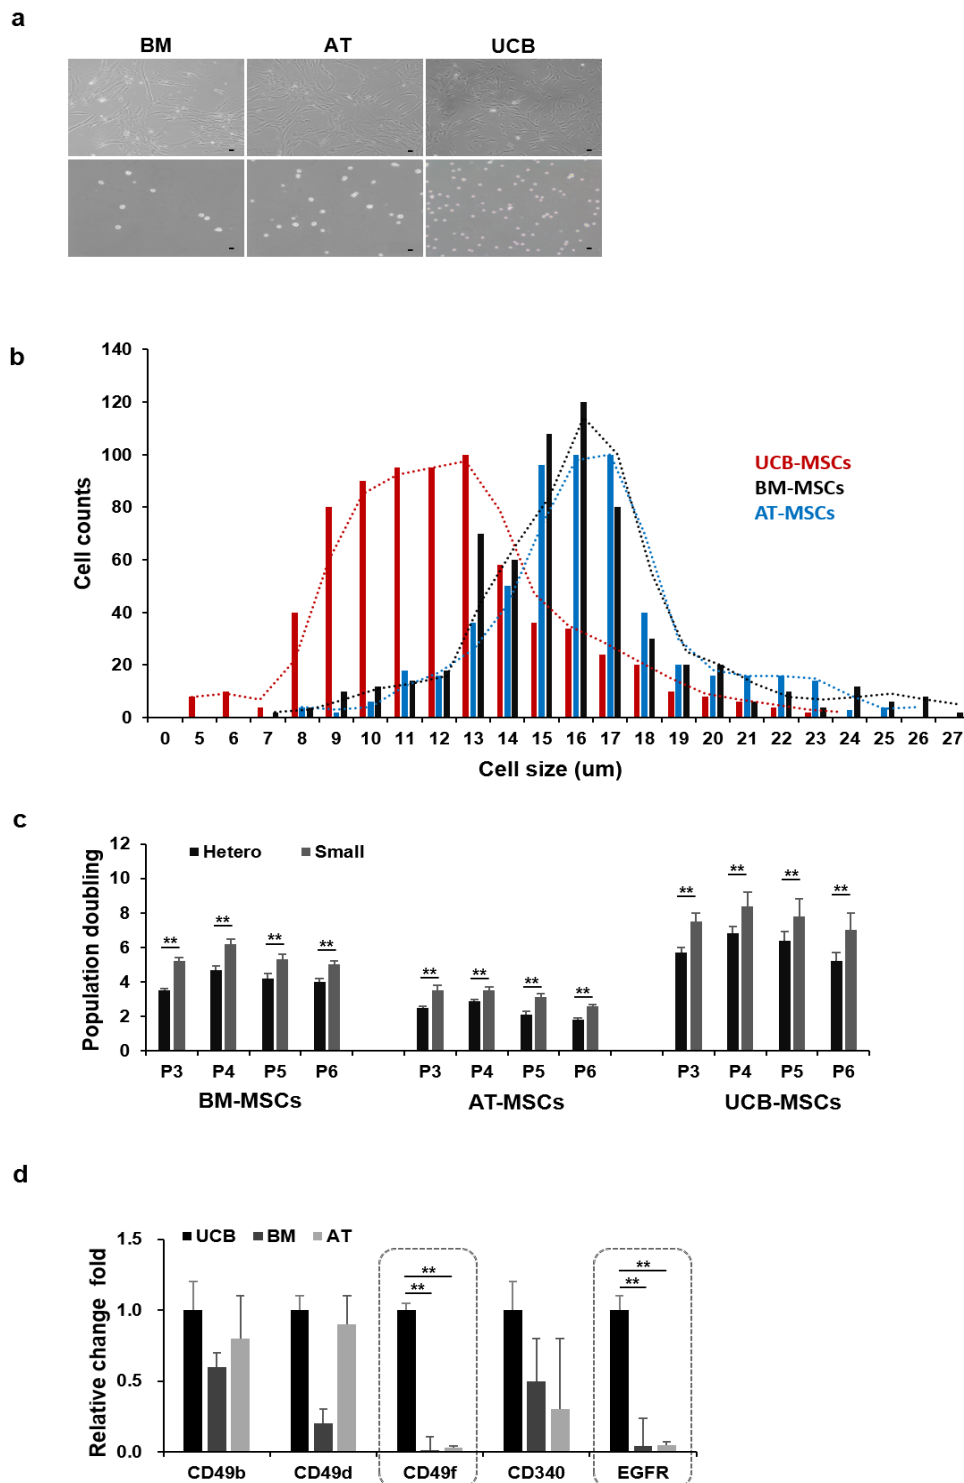



**Supplementary Figure 7.** Improved therapeutic effect of small-size cell population on elastase-induced emphysema mouse model. The two MSC lines were prepared as follows: MSC-I defined as the larger lot and MSC-II as the smaller lot. (a) Histological assessment of lung sections stained by H&E (scale bar = 50  $\mu$ m). Morphometric analysis to quantify the MLI (mean  $\pm$  SD, n = 40; \*\* p < 0.01). (b) Representative immunofluorescence photomicrographs of vWF staining in the lungs in each group. vWF was labeled with FITC (green), and nuclei were labeled with DAPI (blue). The number of vWF-positive cells was counted in six randomly chosen fields. Percentage of vWF-positive cells was quantified based on the number of nuclei (mean  $\pm$  SD, n = 6; \*\* p < 0.01). Scale bar = 50  $\mu$ m.

**a**

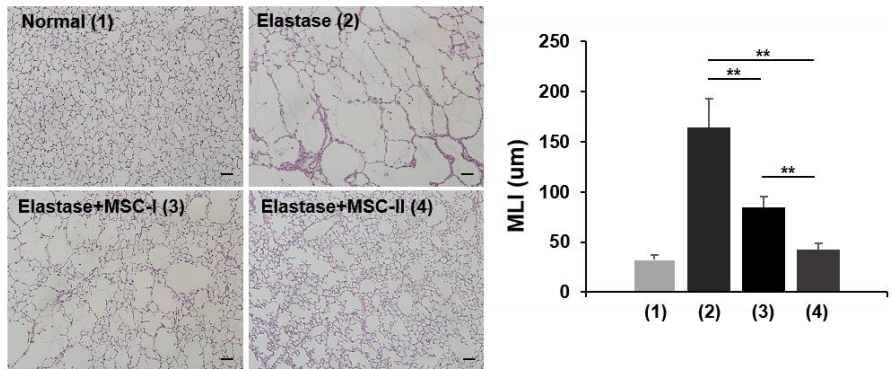

**b**

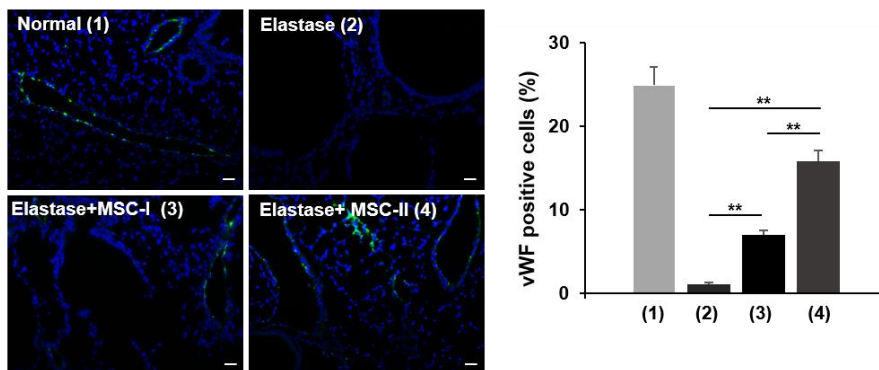

**Supplementary Figure 8.** Secretome analysis on MSCs. Biotin label-based antibody array was performed using the supernatants collected from small and heterogenous cells at passage 5. (a) Functional categories were classified by biological process annotation. (b) Quantification of the optical intensity of secretion factor. Intensity analysis showed up-regulated protein secretion in the small cell compared to in hetero cell. Protein levels were evaluated as the fold-increase, with data normalized to intensity of hetero, which was defined as 1. The quantification of optical density was performed and normalized to the positive control. VEGF, vascular endothelial growth factor; EGF, epidermal Growth Factor; TIMP-2, tissue inhibitor of metalloproteinases 2; TSP-1, thrombospondin-1.

**a**

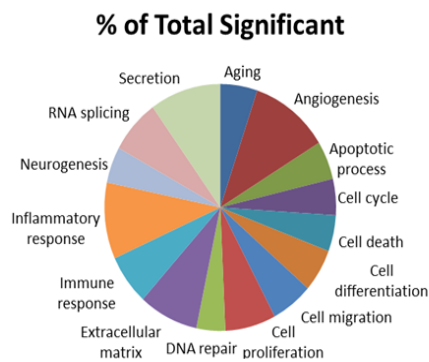

**b**

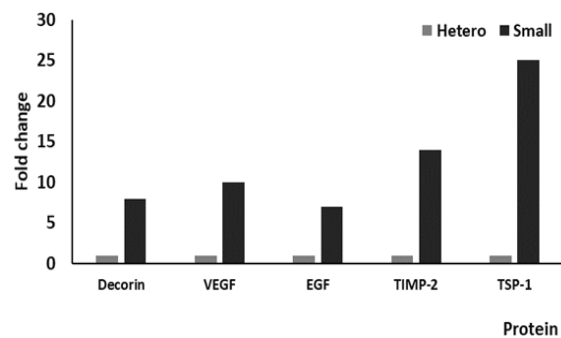

**Supplementary Figure 9.** Karyotyping analysis of small-size population at passage 15.

## Normal Karyotype

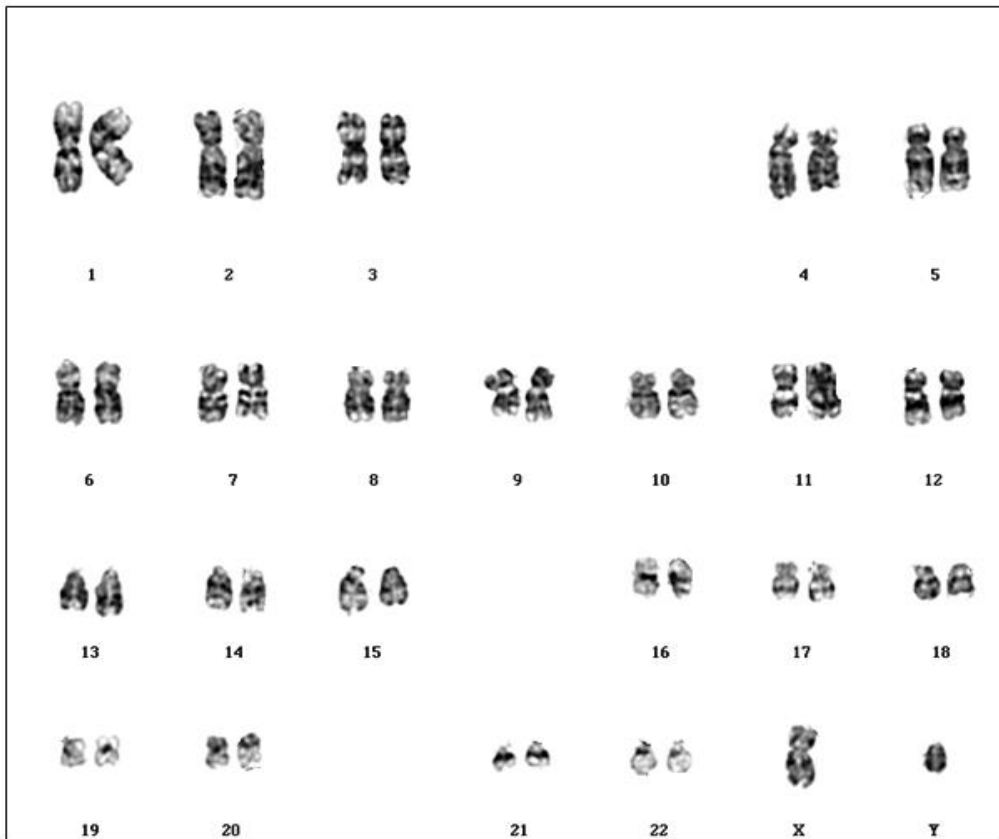

NAME: Small size cell, P15

RESULT: 46,XY (20)

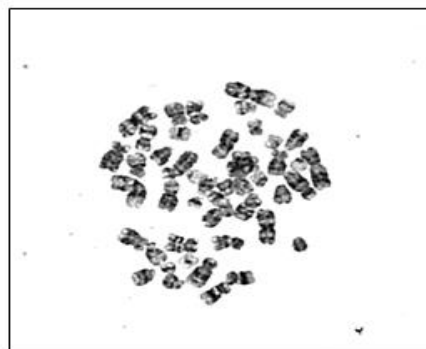

**Supplementary Table 1.** Basic characteristics of UCB-MSCs.

| UCB-MSCs | Cell surface marker |          | Differentiation |
|----------|---------------------|----------|-----------------|
|          | Positive            | Negative |                 |
| #1       | Pass                | Pass     | Pass            |
| #2       | Pass                | Pass     | Pass            |
| #3       | Pass                | Pass     | Pass            |
| #4       | Pass                | Pass     | Pass            |
| #5       | Pass                | Pass     | Pass            |
| #6       | Pass                | Pass     | Pass            |
| #7       | Pass                | Pass     | Pass            |
| #8       | Pass                | Pass     | Pass            |
| #9       | Pass                | Pass     | Pass            |
| #10      | Pass                | Pass     | Pass            |

UCBs were harvested from 10 independent donors (UCB #1 to 10). MSC features were analyzed by representative MSC marker expression or their differentiation capacity (positive: CD29, CD73, CD90, CD105, CD166  $\geq$  80%; negative: CD14, CD45  $\leq$  1.0%; differentiation: osteogenic, chondrogenic, adipogenic).

**Supplementary Table 2.** Cell size and proportion of smaller cells in UCB-MSCs from 10 different donors at P2.

|                                                 | Group I           |                   |                 |                 | Group II         |                   |                   |                   |                  |                  |
|-------------------------------------------------|-------------------|-------------------|-----------------|-----------------|------------------|-------------------|-------------------|-------------------|------------------|------------------|
| Cells                                           | MSCs1             | MSCs2             | MSCs3           | MSCs4           | MSCs5            | MSCs6             | MSCs7             | MSCs8             | MSCs9            | MSCs 10          |
| Small portion (%)                               | 6.7               | 9.2               | 8.1             | 15.6            | 30.3             | 28.5              | 20                | 31.8              | 35               | 50               |
| Cell size<br>(average $\pm$ SD, $\mu\text{m}$ ) | 12.9<br>$\pm 4.3$ | 13.8<br>$\pm 4.7$ | 14<br>$\pm 4.2$ | 14<br>$\pm 5.4$ | 9.8<br>$\pm 2.8$ | 10.9<br>$\pm 3.8$ | 11.1<br>$\pm 2.8$ | 10.2<br>$\pm 2.9$ | 9.6<br>$\pm 2.5$ | 9.3<br>$\pm 2.6$ |
| Cell (number)                                   | 45                | 97                | 110             | 45              | 67               | 56                | 50                | 170               | 171              | 51               |

Smaller portion: percentage of MSCs  $\leq 8 \mu\text{m}$  in diameter. Data are shown as mean  $\pm$  SD.

**Supplementary Table 3.** Primer sequences used for indicated target genes and siRNA sequences.

| Gene           | Primer Sequence (5'-3')                                                                                         |
|----------------|-----------------------------------------------------------------------------------------------------------------|
| Oct4           | CAATTTGCCAAGCTCCTGA<br>CGTTTGGCTGAATACCTTCC                                                                     |
| Nanog          | AGATGCCTCACACGGAGACT<br>TTTGCGACACTCTTCTCTGC                                                                    |
| EGFR           | TTCCTCCCAGTGCCTGAA<br>GGGTTCAAGAGGCTGATTGTG                                                                     |
| CD49f          | TTTGAAGATGGGCCTTATGAA<br>CCCTGAGTCCAAAGAAAAACC                                                                  |
| $\beta$ -actin | AGATGCCTCACACGGAGACT<br>TTTGCGACACTCTTCTCTGC                                                                    |
| Scramble siRNA | UGGUUUACAUGUCGACUAA<br>UGGUUUACAUGUUGUGUGA<br>UGGUUUACAUGUUUUCUGA<br>UGGUUUACAUGUUUCCUA<br>CAAAGUGUGUAAACGGAAUA |
| EGFR siRNA     | CCAUAAAUGCUACGAAUAU<br>GUAACAAGCUCACGCAGUU<br>CAGAGGAUGUCAAUAACU<br>GGAUCGAGUUUGAUAAACGA                        |
| CD49 siRNA     | GGAUAUGCCUCCAGGUUAA<br>GAAAGGGAUUGUUCGUGUA<br>ACAGAUAGAUGAUAAACAGA                                              |

**Supplementalry Table 4.** Expression levels (%) of 242 human cell surface markers in UCB-MSCs at passage 5 in heterogeneous and small populations as analyzed by flow cytometry.

| Plate 1 |        |       | Plate 2            |        |       | Plate 3                |        |       |
|---------|--------|-------|--------------------|--------|-------|------------------------|--------|-------|
| Marker  | Hetero | Small | Marker             | Hetero | Small | Marker                 | Hetero | Small |
| CD1a    | 0.72   | 0.07  | CD86               | 0.82   | 0.15  | CD279                  | 0.83   | 0.61  |
| CD1b    | 0.84   | 0.26  | CD87               | 0.61   | 2.79  | CD282                  | 0.71   | 0.25  |
| CD2     | 0.42   | 0.14  | CD88               | 0.42   | 0.28  | CD305                  | 0.72   | 0.22  |
| CD3     | 0.24   | 0.17  | CD89               | 0.56   | 0.3   | CD309                  | 1.14   | 0.33  |
| CD4     | 0.34   | 0.14  | CD90               | 99.66  | 99.19 | CD314                  | 0.92   | 0.21  |
| CD4v4   | 0.46   | 0.42  | CD91               | 55.04  | 51.93 | CD321                  | 1.43   | 0.41  |
| CD5     | 0.1    | 0.12  | CDw93              | 0.29   | 2.84  | CDw327                 | 0.7    | 0.17  |
| CD6     | 0.32   | 0.14  | CD94               | 0.7    | 0.48  | CDw328                 | 0.96   | 0.08  |
| CD7     | 0.28   | 0.12  | CD95               | 77.84  | 99.29 | CDw329                 | 1.56   | 0.2   |
| CD8a    | 0.23   | 0.15  | CD97               | 10.39  | 9.2   | CD335                  | 1.52   | 0.16  |
| CD8b    | 0.23   | 0.16  | CD98               | 99.79  | 99.74 | CD336                  | 1.27   | 0.13  |
| CD9     | 74.66  | 81.48 | CD99               | 98.64  | 99.83 | CD337                  | 2.13   | 0.45  |
| CD10    | 1.01   | 10.81 | CD99R              | 77.12  | 82.76 | CD338                  | 0.92   | 1.51  |
| CD11a   | 0.93   | 0.18  | CD100              | 0.99   | 0.61  | CD340                  | 31.23  | 98.68 |
| CD11b   | 0.79   | 0.14  | CD102              | 0.95   | 0.73  | $\alpha\beta$ TCR      | 4.96   | 0.7   |
| CD11c   | 0.34   | 0.12  | CD103              | 0.44   | 0.25  | $\beta$ 2microglobulin | 88.67  | 99.65 |
| CD13    | 97.2   | 97.09 | CD105              | 99.88  | 99.89 | BLTR-1                 | 1.59   | 0.18  |
| CD14    | 0.45   | 0.61  | CD106              | 24.41  | 13.03 | CLIP                   | 1.05   | 0.26  |
| CD15    | 0.09   | 0.12  | CD107a             | 26.67  | 55.66 | CMRF-44                | 0.53   | 0.3   |
| CD15s   | 0.21   | 0.08  | CD107b             | 15.55  | 5.45  | CMRF-56                | 1.18   | 0.51  |
| CD16    | 0.47   | 0.22  | CD108              | 79.64  | 97.26 | EGF receptor           | 45.39  | 96.48 |
| CD18    | 0.44   | 0.18  | CD109              | 95.79  | 99.58 | fMLP receptor          | 1.91   | 0.74  |
| CD19    | 0.26   | 0.18  | CD112              | 14.1   | 29.51 | $\gamma\delta$ TCR     | 2.03   | 0.34  |
| CD20    | 0.52   | 0.24  | CD114              | 0.97   | 0.39  | Hem.Prog.Cell          | 5.13   | 1.59  |
| CD21    | 1.03   | 0.2   | CD116              | 0.94   | 0.48  | HLA-A, B, C            | 99.62  | 99.79 |
| CD22    | 0.67   | 0.19  | CD117              | 0.94   | 0.26  | HLA-A2                 | 99.65  | 99.83 |
| CD23    | 0.64   | 0.11  | CD118              | 0.56   | 0.31  | HLA-DQ                 | 23.27  | 8.4   |
| CD24    | 0.51   | 0.16  | CD119              | 58.26  | 55.81 | HLA-DR                 | 0.71   | 0.35  |
| CD25    | 0.42   | 0.16  | CD120a             | 5.94   | 19.55 | HLA-DR, DP, DQ         | 0.58   | 0.35  |
| CD26    | 11.43  | 11.81 | CD121a             | 1.8    | 1.86  | Invariant NKT          | 1.13   | 0.2   |
| CD26    | 11.43  | 11.81 | CD121b             | 2.15   | 0.29  | GD2 <sup>1</sup>       | 54.94  | 9.98  |
| CD27    | 0.59   | 0.22  | CD122              | 6.25   | 0.49  | MIC A/B                | 0.57   | 0.17  |
| CD28    | 1.5    | 0.17  | CD123              | 2.24   | 0.37  | NKB1                   | 1.22   | 0.2   |
| CD29    | 97.54  | 98.34 | CD124              | 3.84   | 0.57  | SSEA-1                 | 0.35   | 0.41  |
| CD30    | 2.91   | 0.48  | CD126              | 2.05   | 0.55  | SSEA-4                 | 52.44  | 67.01 |
| CD31    | 0.5    | 0.29  | CD127              | 0.47   | 0.43  | TRA-1-60               | 0.61   | 0.76  |
| CD32    | 0.5    | 0.59  | CD128b             | 0.58   | 0.17  | TRA-1-81               | 0.39   | 0.44  |
| CD33    | 0.7    | 0.17  | CD130              | 12.78  | 28.49 | V $\beta$ 23           | 3.72   | 0.51  |
| CD34    | 3.25   | 0.6   | CD134              | 0.83   | 0.36  | V $\beta$ 8            | 1.45   | 16.79 |
| CD35    | 93.29  | 0.28  | CD135              | 0.39   | 0.31  | mIgM                   | 0.19   | 0.25  |
| CD36    | 0.66   | 0.24  | CD137              | 0.43   | 0.23  | mIgG1                  | 0.3    | 0.14  |
| CD37    | 1.2    | 0.16  | CD137 <sup>2</sup> | 3.81   | 0.7   | mIgG2a                 | 0.18   | 0.24  |
| CD38    | 0.99   | 0.23  | CD138              | 87.76  | 92.86 | mIgG2b                 | 0.24   | 0.18  |
| CD39    | 4.39   | 0.46  | CD140a             | 76.81  | 97.18 | mIgG3                  | 0.36   | 0.49  |
| CD40    | 1.23   | 0.42  | CD140b             | 99.34  | 99.82 | CD49f                  | 26.58  | 75.93 |
| CD41a   | 0.99   | 0.23  | CD141              | 63.94  | 25.29 | CD104                  | 0.09   | 0.35  |

|                   |       |       |        |       |       |                    |      |       |
|-------------------|-------|-------|--------|-------|-------|--------------------|------|-------|
| CD41b             | 0.15  | 0.04  | CD142  | 2.45  | 3.56  | CD120b             | 0.15 | 0.12  |
| CD42a             | 7.59  | 0.80  | CD144  | 1.34  | 0.53  | CD132              | 0.12 | 0.35  |
| CD42b             | 1.42  | 0.21  | CD146  | 99.68 | 99.74 | CD201              | 51.1 | 78.93 |
| CD43              | 1.05  | 0.32  | CD147  | 99.84 | 99.95 | CD210              | 0.25 | 0.85  |
| CD44              | 99.05 | 99.76 | CD150  | 0.99  | 0.92  | CD212              | 0.18 | 0.08  |
| CD45              | 2.5   | 0.51  | CD151  | 99.45 | 99.23 | CD267              | 0.13 | 0.1   |
| CD45RA            | 1.63  | 0.62  | CD152  | 23.86 | 17.79 | CD294              | 0.13 | 0.06  |
| CD45RB            | 0.7   | 0.12  | CD153  | 3.66  | 0.42  | CD326              | 4.58 | 1.36  |
| CD45RO            | 0.7   | 0.48  | CD154  | 2.06  | 0.42  | CLA <sup>3</sup>   | 0.28 | 0.18  |
| CD46              | 97.77 | 99.58 | CD158a | 0.41  | 0.96  | Integrin $\beta$ 7 | 0.1  | 0.06  |
| CD47              | 97.71 | 99.88 | CD158b | 3.34  | 0.76  | SSEA-3             | 0.78 | 0.4   |
| CD48              | 6.98  | 0.74  | CD161  | 1.81  | 0.45  | rIgM               | 0.22 | 0.18  |
| CD49a             | 90.67 | 47.74 | CD162  | 3.77  | 1     | rIgG1              | 0.16 | 0.08  |
| CD49b             | 29.04 | 79.47 | CD163  | 0.49  | 0.35  | rIgG2a             | 0.18 | 0.05  |
| CD49c             | 98.71 | 99.65 | CD164  | 53.18 | 71.87 | rRIgG2b            | 0.34 | 0.3   |
| CD49d             | 48.73 | 72.21 | CD165  | 98.17 | 99.74 |                    |      |       |
| CD49e             | 99.26 | 99.84 | CD166  | 99.72 | 99.91 |                    |      |       |
| CD50              | 4.83  | 1.91  | CD171  | 1.1   | 0.53  |                    |      |       |
| CD51/61           | 89.52 | 96.28 | CD172b | 1.22  | 2.47  |                    |      |       |
| CD53              | 1.67  | 0.28  | CD177  | 1.87  | 0.58  |                    |      |       |
| CD54              | 35.02 | 14.08 | CD178  | 1.62  | 0.42  |                    |      |       |
| CD55              | 86.08 | 95.08 | CD180  | 6.44  | 0.5   |                    |      |       |
| CD56              | 3.93  | 2.22  | CD181  | 7.01  | 2.06  |                    |      |       |
| CD57              | 1.18  | 0.47  | CD183  | 6.09  | 0.81  |                    |      |       |
| CD58              | 95.74 | 99.73 | CD184  | 4.1   | 1.16  |                    |      |       |
| CD59              | 99.76 | 99.91 | CD193  | 2.41  | 1.65  |                    |      |       |
| CD61              | 81.54 | 96.71 | CD195  | 0.12  | 0.21  |                    |      |       |
| CD62E             | 3.22  | 0.73  | CD196  | 4     | 0.51  |                    |      |       |
| CD62L             | 2.24  | 0.23  | CD197  | 1.75  | 0.35  |                    |      |       |
| CD62P             | 0.39  | 0.35  | CD200  | 1.95  | 0.12  |                    |      |       |
| CD63              | 71.8  | 97.95 | CD205  | 0.14  | 1.1   |                    |      |       |
| CD64              | 0.91  | 0.37  | CD206  | 0.49  | 0.37  |                    |      |       |
| CD66 <sup>4</sup> | 0.77  | 0.28  | CD209  | 4.47  | 4.79  |                    |      |       |
| CD66b             | 0.3   | 0.17  | CD220  | 11.29 | 4.49  |                    |      |       |
| CD66f             | 0.85  | 0.22  | CD221  | 27.67 | 26.19 |                    |      |       |
| CD69              | 0.62  | 0.2   | CD226  | 2.94  | 0.38  |                    |      |       |
| CD70              | 0.18  | 0.03  | CD227  | 24.18 | 4.84  |                    |      |       |
| CD71              | 41.71 | 50.17 | CD229  | 0.3   | 0.39  |                    |      |       |
| CD72              | 0.45  | 1.06  | CD231  | 0.58  | 0.34  |                    |      |       |
| CD73              | 99.63 | 99.49 | CD235a | 1.31  | 0.86  |                    |      |       |
| CD74              | 0.84  | 0.82  | CD243  | 3.76  | 1.69  |                    |      |       |
| CD75              | 2.01  | 0.41  | CD244  | 0.1   | 0.27  |                    |      |       |
| CD77              | 4.54  | 6.62  | CD255  | 0.29  | 0.3   |                    |      |       |
| CD79b             | 8.77  | 0.68  | CD268  | 1.57  | 0.75  |                    |      |       |
| CD80              | 1.42  | 0.55  | CD271  | 4.19  | 0.86  |                    |      |       |
| CD81              | 99.24 | 99.49 | CD273  | 91.5  | 99.77 |                    |      |       |
| CD83              | 3.35  | 0.56  | CD274  | 77.92 | 97.17 |                    |      |       |
| CD84              | 0.73  | 0.34  | CD275  | 3.9   | 1.74  |                    |      |       |
| CD85              | 0.34  | 0.7   | CD278  | 1.57  | 0.45  |                    |      |       |

<sup>1</sup> Disialoganglioside GD2, <sup>2</sup> CD137 ligand, <sup>3</sup> Cutaneous Lymph A, <sup>4</sup>CD166 (a, c, d, e)



**Supplementary Table 5.** The expression of EGFR and CD49f on small size cell during passaging as analyzed by flow cytometry.

| Passage | Expression (%) |             |             |             |
|---------|----------------|-------------|-------------|-------------|
|         | EGFR+CD49F+    | EGFR+CD49f- | EGFR-CD49f+ | EGFR-CD49f- |
| 3       | 70             | 9           | 8           | 13          |
| 5       | 52             | 15          | 7           | 25          |
| 7       | 40             | 11          | 4           | 45          |
